# Supplementary material for: Acid-Sensing Ion Channel 2a (ASIC2a) Promotes Surface Trafficking of ASIC2b via Heteromeric Assembly
Source: PubMed Central journal article supplement (PMC4967927; doi:10.1038/srep30684), 2016-08-01
Supplement: srep30684-s1.pdf [file srep30684-s1.pdf]

## **Supplementary Information**

### **Acid-Sensing Ion Channel 2a (ASIC2a) Promotes Surface Trafficking of ASIC2b via Heteromeric Assembly**

Hae-Jin Kweon<sup>1</sup>, Dong-Il Kim<sup>1</sup>, Yeonju Bae<sup>2</sup>, Jae-Yong Park<sup>2</sup>, and Byung-Chang Suh<sup>1</sup>

<sup>1</sup>Department of Brain & Cognitive Sciences, DGIST, Daegu 42988, Republic of Korea

<sup>2</sup>School of Biosystem and Biomedical Science, College of Health Science, Korea University, Seoul  
02841, Republic of Korea

## Supplementary Tables

**Table S1. Primers and templates used for chimera construction.**

|               | Fragment 1                          |                                      | Fragment 2                         |                            | Template   |            |
|---------------|-------------------------------------|--------------------------------------|------------------------------------|----------------------------|------------|------------|
|               | FP (5'-3')                          | RP (5'-3')                           | FP (5'-3')                         | RP (5'-3')                 | Fragment 1 | Fragment 2 |
| <b>Ch1</b>    | tcgaattctatggacctcaaggagagc         | ggccagcacccacagcgacgccggatggtcagcgg  | ccgctgacctccggcgtcgctgtgggtgctggcc | gcggtacctcagcaggcaatctcctc | ASIC2a     | ASIC2b     |
| <b>Ch2</b>    | tcgaattctatggacctcaaggagagc         | tcgctgtgtgacgggaatgagaaatagtaggatac  | gtatcctactatttctattcccgtcacacacgca | gcggtacctcagcaggcaatctcctc | ASIC2a     | ASIC2b     |
| <b>Ch3</b>    | tcgaattctatggacctcaaggagagc         | ggggtgtgttgacacaggtcacagctgggaagac   | gtctcccagctgtgacctgtgcaacaacaacccc | gcggtacctcagcaggcaatctcctc | ASIC2a     | ASIC2b     |
| <b>2a-P</b>   | tcgaattctatggacctcaaggagagc         | gagggtcacagctgggaacggcagctggcgctcca  | tggagcccgagctgccgttcccagctgtgacctc | gcggtacctcagcaggcaatctcctc | Ch2        | ASIC2a     |
| <b>2a-T</b>   | tcgaattctatggacctcaaggagagc         | ggtaacatgctgatagagagccagtagagcaggcg  | cgctgctctactggctctcatatcagcatgtacc | gcggtacctcagcaggcaatctcctc | Ch1        | ASIC2a     |
| <b>2a-N</b>   | tcgaattctatgagccggagcggcgagcccggctg | ggccactgccccaaagcaccgccgctggaagagcc  | ggctcttcagcggcggtgctttggcagtgcc    | gcggtacctcagcaggcaatctcctc | ASIC2b     | ASIC2a     |
| <b>2a-NTP</b> | tcgaattctatgagccggagcggcgagcccggctg | gccattgaggtgacaggggtgacagcggggaacgg  | ccgtccccgctgtcacctctgcaacctcaatggc | gcggtacctcagcaggcaatctcctc | ASIC2b     | ASIC2a     |
| <b>2b-P</b>   | tcgaattctatgagccggagcggcgagcccggctg | ggtaacatgctgatagagagccagtagagcaggcg  | cgctgctctactggctctcatatcagcatgtacc | gcggtacctcagcaggcaatctcctc | ASIC2b     | Ch3        |
| <b>2b-T</b>   | tcgaattctatgagccggagcggcgagcccggctg | cgtgtgtgacgggaaactgaaatagtaggatactct | agagtatcctactatttcagttcccgtcacacag | gcggtacctcagcaggcaatctcctc | 2b-TP      | ASIC2b     |
| <b>2b-TP</b>  | tcgaattctatgagccggagcggcgagcccggctg | ggccactgccccaaagcaccgccgctggaagagcc  | ggctcttcagcggcggtgctttggcagtgcc    | gcggtacctcagcaggcaatctcctc | ASIC2b     | Ch3        |

**Table S2. Primers used for mutagenesis.**

|                                     | <b>Sense (5'-3')</b>                          | <b>Antisense (5'-3')</b>                      |
|-------------------------------------|-----------------------------------------------|-----------------------------------------------|
| <b>Ch3(H72A)</b>                    | atcctactatttctcatatcaggctgtaccaaggtggatgaagtg | cacttcatccaccttggaacagcctgatatgagaaatagtaggat |
| <b>Ch3(D77A)</b>                    | catgtaccaaggtggctgaagtggaggccag               | ctgggccaccacttcagccaccttgtaacatg              |
| <b>Ch3(E78A)</b>                    | ttaccaaggtggatgcagtggaggccagag                | ctctgggccaccactgcatccaccttgtaa                |
| <b>ASIC2b(<math>\Delta</math>N)</b> | gcgctgtgggtgctgccttc                          | catgaattcgaagcttgagctcga                      |

## Supplementary Figures

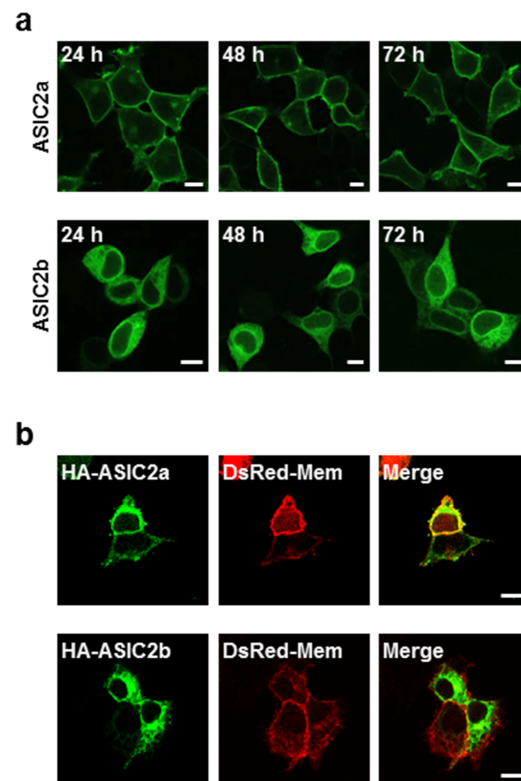

**Figure S1. Differential subcellular localization of ASIC2a and ASIC2b.** (a) Subcellular localization of GFP-tagged ASIC2a or ASIC2b was examined after different days of transfection. ASIC2a is localized in the plasma membrane already 1 day after transfection, while ASIC2b remained in the ER even 3 days after transfection. (b) Immunocytochemistry on HEK293T cells co-expressing the plasma membrane marker DsRed-Mem and HA-ASIC2a (top) or HA-ASIC2b (bottom) by anti-HA antibody. The scale bar represents 10  $\mu\text{m}$ .



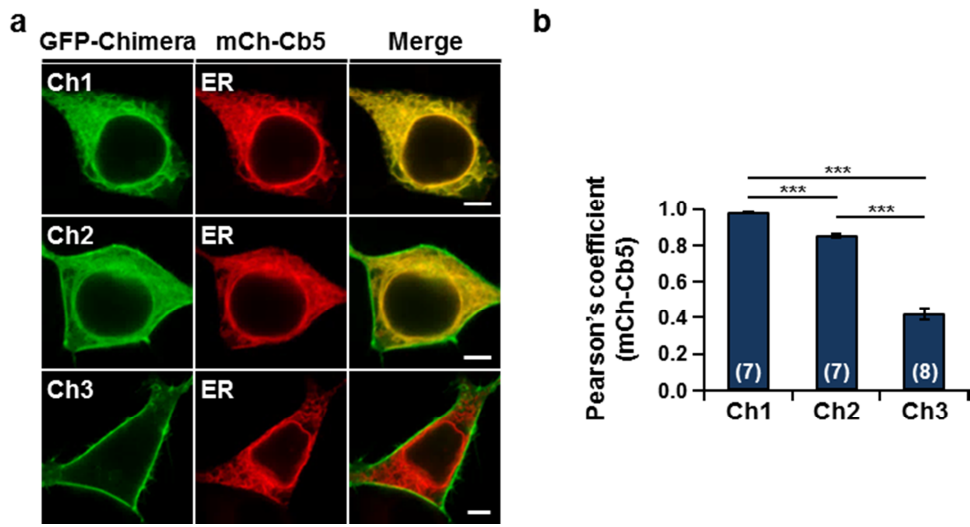

**Figure S2. Chimera assay with an ER marker. (a)** Representative confocal images of HEK293T cells expressing each chimera with the ER marker, mCh-Cb5. The scale bar represents 5  $\mu$ m. **(b)** Pearson's correlation coefficient between the ER marker and each chimera (mean  $\pm$  SEM, \*\*\*  $p < 0.001$ , with one-way ANOVA followed by Bonferroni post-hoc test). The number on each bar indicates n for each condition from three independent experiments.

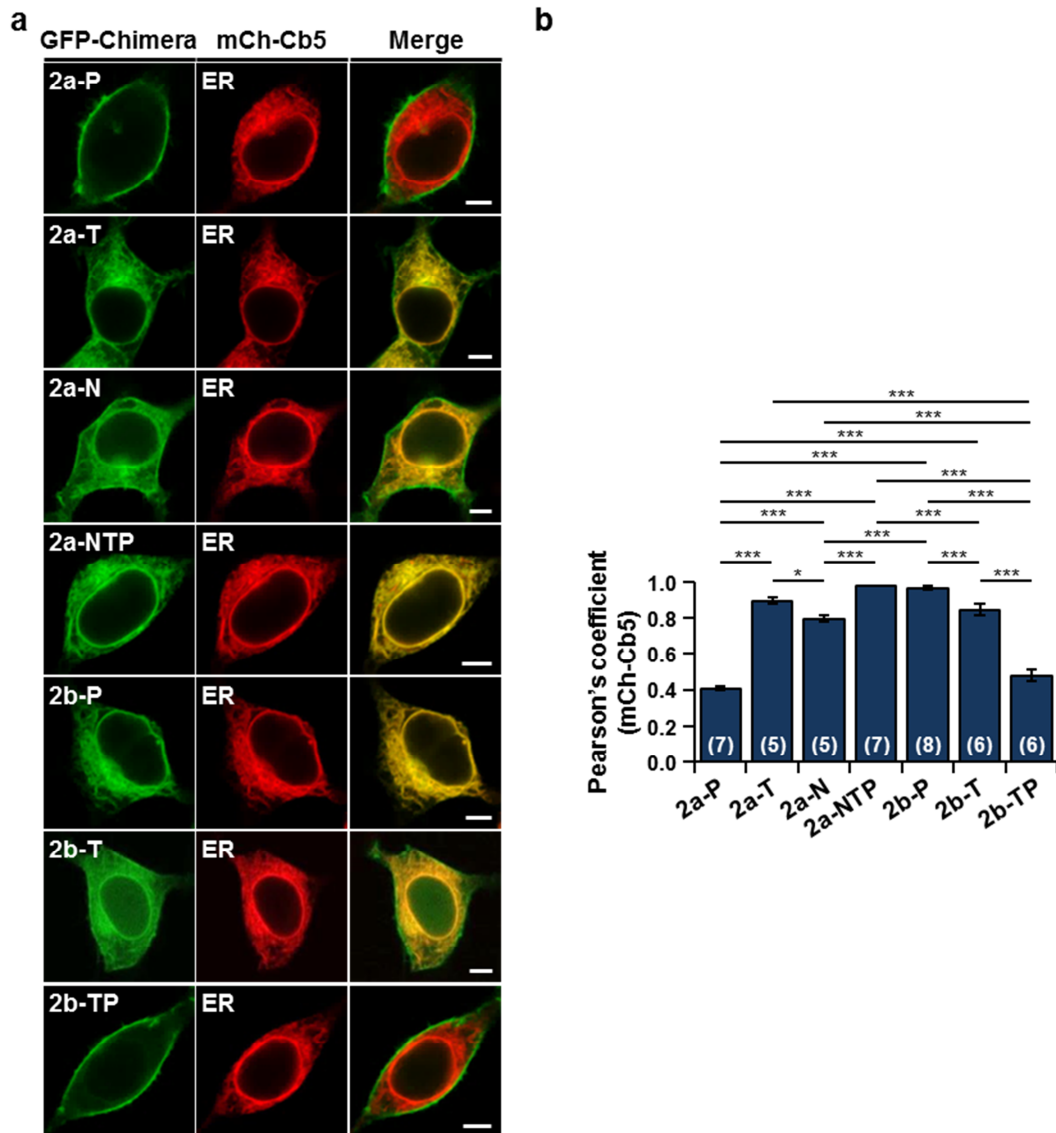

**Figure S3. Chimera assay with an ER marker. (a)** Representative confocal images of HEK293T cells expressing each chimera with the ER marker mCh-Cb5. The scale bar represents 5  $\mu$ m. **(b)** Pearson's correlation coefficient between the ER marker and each chimera (mean  $\pm$  SEM, \*  $p < 0.05$ , \*\*\*  $p < 0.001$ , with one-way ANOVA followed by Bonferroni post-hoc test). The number on each bar indicates n for each condition from three independent experiments.

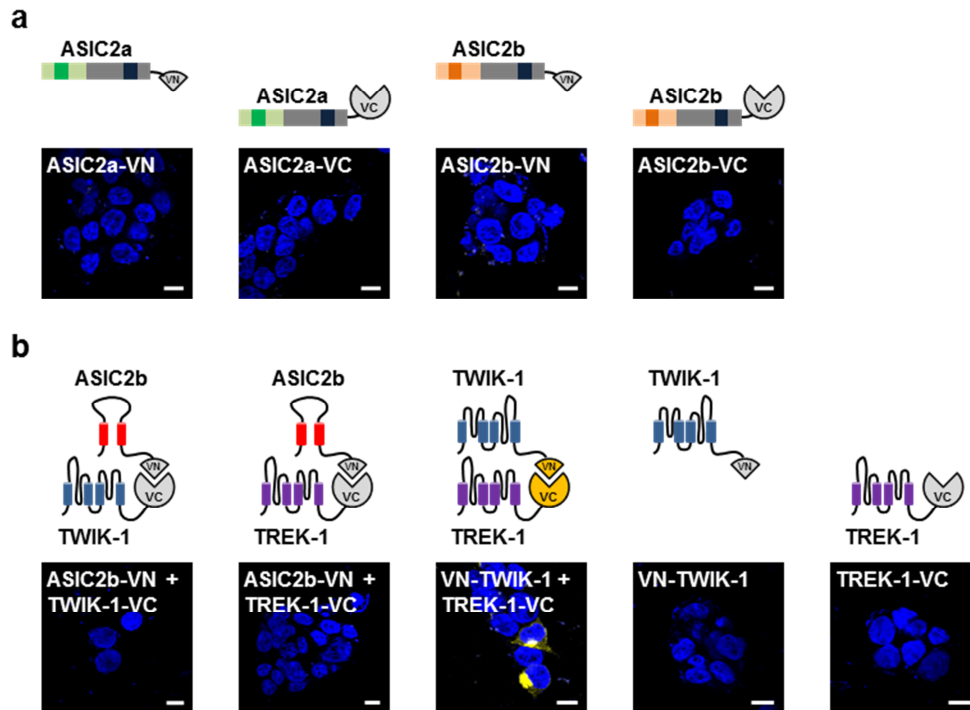

**Figure S4. Control experiments for BiFC assay. (a)** For determination of specificity of BiFC, HEK293T cells were transfected with one half of split Venus protein. No fluorescence was detected when either ASIC2a or ASIC2b with one half of Venus protein was expressed alone. **(b)** ASIC2b-VN was tested with TWIK-1-VC or TREK-1-VC. BiFC signal was detected in cells co-expressing VN-TWIK-1 and TREK-1-VC. No fluorescence was detected when either TWIK-1 or TREK-1 with one half of Venus protein was expressed alone. The scale bar represents 10  $\mu\text{m}$ .

## Supplementary Methods

### *Immunocytochemistry*

HEK293T cells growing on coverslips were co-transfected with HA-tagged vectors and Ds-red membrane marker using PEI (Sigma). The cells were fixed in 4% paraformaldehyde for 20 min at room temperature, and then permeabilized with PBS with 0.1% Triton-X100 for 3 min. Non-specific binding was prevented with 1 h incubation in 5% BSA (Bovogen). Cells were incubated overnight, at 4°C, with anti-HA antibody (Roche Applied Science; 3F10, 1:200). After washing, DyLight 488-conjugated secondary antibody (Jackson Labs, 1:400) was added and incubated for 1 h at room temperature. The cells were washed and mounted, and then observed with an Olympus Fluoview FV1000 confocal microscope (Olympus).
